# Supplementary material for: Screening and Application of Novel Homofermentative Lactic Acid Bacteria Results in Low-FODMAP Whole-Wheat Bread
Source: MDPI journal article supplement (doi:10.3390/fermentation9040336), 2023-03-28
Supplement: s1 [file s1]

# Screening and Application of Novel Homofermentative Lactic Acid Bacteria Results in Low-FODMAP Whole-Wheat Bread

Małgorzata Borowska <sup>1</sup>, Lilit Ispiryan <sup>2</sup>, Emma Neylon <sup>2</sup>, Aylin W. Sahin <sup>2</sup>, Craig P. Murphy <sup>1</sup>, Emanuele Zannini <sup>2,3</sup>, Elke K. Arendt <sup>2,4</sup>, and Aidan Coffey <sup>1,4\*</sup>

<sup>1</sup> Department of Biological Sciences, Munster Technological University, Cork, T12P928, Ireland.

<sup>2</sup> School of Food and Nutritional Sciences, University College, Cork, T12 YN60, Ireland.

<sup>3</sup> Department of Environmental Biology, Sapienza University of Rome, Piazzale Aldo Moro 5, 00185 Rome, Italy;

<sup>4</sup> APC Microbiome Ireland, T12 YT20 Cork, Ireland

\* Correspondence aidan.coffey@mtu.ie; Tel: +353 21 4335486

**Table S1.** Collection of 244 lactic acid bacteria used in the study.

| Strain                                                                              | Origin              |
|-------------------------------------------------------------------------------------|---------------------|
| <i>Enterococcus faecium</i> LT105                                                   | Lentil sourdough    |
| <i>Enterococcus faecium</i> LT108                                                   | Lentil sourdough    |
| <i>Enterococcus faecium</i> TG102                                                   | Tigernut sourdough  |
| <i>Lactocaseibacillus paracasei</i> R18                                             | Human               |
| <i>Lactocaseibacillus casei</i> MTUS21                                              | Cheese              |
| <i>Lactocaseibacillus paracasei</i> R3                                              | Bovine              |
| <i>Lactocaseibacillus paracasei</i> subsp. <i>paracasei</i> DSM 20006               | Beer                |
| <i>Lactocaseibacillus rhamnosus</i> MTUS10                                          | Cheese              |
| <i>Lactocaseibacillus rhamnosus</i> MTUS9                                           | Cheese              |
| <i>Lactiplantibacillus argentoratensis</i> DSM 16365 <sup>T</sup>                   | Cassava roots       |
| <i>Lactiplantibacillus plantarum</i> F2                                             | Sourdough           |
| <i>Lactiplantibacillus plantarum</i> F5                                             | Sourdough           |
| <i>Lactiplantibacillus plantarum</i> FB102                                          | Faba bean sourdough |
| <i>Lactiplantibacillus plantarum</i> FST1.7                                         | Malted barley       |
| <i>Lactiplantibacillus plantarum</i> FST1.9                                         | Unknown             |
| <i>Lactiplantibacillus plantarum</i> LT102                                          | Lentil sourdough    |
| <i>Lactiplantibacillus plantarum</i> R11                                            | Cheese              |
| <i>Lactiplantibacillus plantarum</i> R13                                            | Cheese              |
| <i>Lactiplantibacillus plantarum</i> R14                                            | Human               |
| <i>Lactiplantibacillus plantarum</i> R25                                            | Human               |
| <i>Lactiplantibacillus plantarum</i> R27                                            | Human               |
| <i>Lactiplantibacillus plantarum</i> R8                                             | Human               |
| <i>Lactiplantibacillus plantarum</i> RY(R7)                                         | Human               |
| <i>Lactiplantibacillus plantarum</i> subsp. <i>plantarum</i> DSM 20174 <sup>T</sup> | Pickled cabbage     |
| <i>Lactiplantibacillus plantarum</i> subsp. <i>plantarum</i> DSM 20205              | Unknown             |
| <i>Lactiplantibacillus plantarum</i> subsp. <i>plantarum</i> DSM 2601               | Pickled cabbage     |
| <i>Lactiplantibacillus plantarum</i> subsp. <i>plantarum</i> DSM 2648               | Silage              |
| <i>Lactiplantibacillus plantarum</i> subsp. <i>plantarum</i> DSM 12028              | Sausage             |

| Strain                                                                 | Origin                  |
|------------------------------------------------------------------------|-------------------------|
| <i>Lactiplantibacillus plantarum</i> subsp. <i>plantarum</i> DSM 13273 | Jojoba meal             |
| <i>Lactobacillus agilis</i> DSM 20509 <sup>T</sup>                     | Sewage                  |
| <i>Lactobacillus amylovorus</i> AB32                                   | Buckwheat sourdough     |
| <i>Lactobacillus amylovorus</i> AB36                                   | Teff sourdough          |
| <i>Lactobacillus amylovorus</i> DSM 20531 <sup>T</sup>                 | Corn                    |
| <i>Lactobacillus amylovorus</i> FST2.11                                | Cereal                  |
| <i>Lactobacillus amyloyticus</i> DSM 11664 <sup>T</sup>                | Beer worth              |
| <i>Lactobacillus crispatus</i> AB19                                    | Buckwheat sourdough     |
| <i>Lactobacillus crispatus</i> DSM 20584 <sup>T</sup>                  | Eye                     |
| <i>Lactobacillus curvatus</i> BR103                                    | Brown rice sourdough    |
| <i>Lactobacillus gasseri</i> M11                                       | Murine                  |
| <i>Lactobacillus intestinalis</i> DSM 6629 <sup>T</sup>                | Rat                     |
| <i>Lactobacillus johnsonii</i> DSM 10533 <sup>T</sup>                  | Human                   |
| <i>Lactobacillus mali</i> DSM 20444 <sup>T</sup>                       | Apple juice             |
| <i>Lactobacillus ruminis</i> DSM 20403 <sup>T</sup>                    | Bovine                  |
| <i>Lactococcus lactis</i> DSM 20069 <sup>T</sup>                       | Unknown                 |
| <i>Lapidilactobacillus dextrinicus</i> DSM 20293                       | Beer                    |
| <i>Latilactobacillus curvatus</i> BR104                                | Brown rice sourdough    |
| <i>Latilactobacillus curvatus</i> BR110                                | Brown rice sourdough    |
| <i>Latilactobacillus curvatus</i> FB104                                | Faba bean sourdough     |
| <i>Latilactobacillus curvatus</i> LT102                                | Lentil sourdough        |
| <i>Latilactobacillus curvatus</i> SG102                                | Sorghum sourdough       |
| <i>Latilactobacillus curvatus</i> SG106                                | Sorghum sourdough       |
| <i>Latilactobacillus curvatus</i> SG113                                | Sorghum sourdough       |
| <i>Latilactobacillus sakei</i> FB103                                   | Faba bean sourdough     |
| <i>Latilactobacillus sakei</i> YP2 7.1.11A                             | Yellow pea sourdough    |
| <i>Ligilactobacillus murinus</i> DSM 20452 <sup>T</sup>                | Rat                     |
| <i>Liquorilactobacillus nagelii</i> DSM 13675 <sup>T</sup>             | Wine                    |
| <i>Loigolactobacillus coryniformis</i> BR100                           | Brown rice sourdough    |
| <i>Pediococcus pentosaceus</i> B1 7.1.2A                               | Sourdough               |
| <i>Pediococcus pentosaceus</i> B1 7.1.4A                               | Sourdough               |
| <i>Pediococcus pentosaceus</i> B1 7.1.5A                               | Sourdough               |
| <i>Pediococcus pentosaceus</i> B1 7.1.6A                               | Sourdough               |
| <i>Pediococcus pentosaceus</i> B1 7.1.7A                               | Sourdough               |
| <i>Pediococcus pentosaceus</i> B1 7.1.8A                               | Sourdough               |
| <i>Pediococcus pentosaceus</i> B1 7.1.9A                               | Sourdough               |
| <i>Pediococcus pentosaceus</i> BB3 8.1.1A                              | Sourdough               |
| <i>Pediococcus pentosaceus</i> RYE100                                  | Rye sourdough           |
| <i>Pediococcus pentosaceus</i> RYE102                                  | Rye sourdough           |
| <i>Pediococcus pentosaceus</i> RYE104                                  | Rye sourdough           |
| <i>Pediococcus pentosaceus</i> RYE106                                  | Rye sourdough           |
| <i>Pediococcus pentosaceus</i> WW105                                   | Whole wheat flour       |
| BK101                                                                  | Baker's flour sourdough |
| BK102                                                                  | Baker's flour sourdough |
| BK103                                                                  | Baker's flour sourdough |
| BK104                                                                  | Baker's flour sourdough |

| Strain     | Origin                  |
|------------|-------------------------|
| BK105      | Baker's flour sourdough |
| BK106      | Baker's flour sourdough |
| BK107      | Baker's flour sourdough |
| BK108      | Baker's flour sourdough |
| BR101      | Brown rice sourdough    |
| BR102      | Brown rice sourdough    |
| BR107      | Brown rice sourdough    |
| BR111      | Brown rice sourdough    |
| FB100      | Faba bean sourdough     |
| FB101      | Faba bean sourdough     |
| FB105      | Faba bean sourdough     |
| FB106      | Faba bean sourdough     |
| FB108      | Faba bean sourdough     |
| GP1 8.1.1B | Green pea sourdough     |
| GP1 8.1.1C | Green pea sourdough     |
| GP1 8.1.2A | Green pea sourdough     |
| GP2 8.1.1A | Green pea sourdough     |
| GP2 8.1.2A | Green pea sourdough     |
| GP2 8.1.3A | Green pea sourdough     |
| GP2 8.1.4A | Green pea sourdough     |
| GP2 8.1.5A | Green pea sourdough     |
| GP3 7.1.1A | Green pea sourdough     |
| GP3 7.1.3A | Green pea sourdough     |
| GP3 7.1.4A | Green pea sourdough     |
| GP3 7.1.5A | Green pea sourdough     |
| GP3 7.1.6A | Green pea sourdough     |
| GP3 7.1.7A | Green pea sourdough     |
| LK303      | Leek                    |
| LK311      | Leek                    |
| LK323      | Leek                    |
| LT101      | Lentil sourdough        |
| LT103      | Lentil sourdough        |
| LT106      | Lentil sourdough        |
| LT107      | Lentil sourdough        |
| LT111      | Lentil sourdough        |
| LT112      | Lentil sourdough        |
| LT113      | Lentil sourdough        |
| LT114      | Lentil sourdough        |
| MT1 7.1.2A | Millet sourdough        |
| MT1 7.1.3A | Millet sourdough        |
| MT1 7.1.4A | Millet sourdough        |
| MT2 6.1.2A | Millet sourdough        |
| MT2 6.1.3A | Millet sourdough        |
| MT2 6.1.4A | Millet sourdough        |
| MT3 7.1.1A | Millet sourdough        |
| MZ1 6.1.2A | Maize sourdough         |

| Strain     | Origin            |
|------------|-------------------|
| MZ1 6.1.3A | Maize sourdough   |
| MZ1 6.1.4A | Maize sourdough   |
| MZ1 6.1.5A | Maize sourdough   |
| MZ1 6.1.6A | Maize sourdough   |
| MZ2 6.1.2A | Maize sourdough   |
| MZ2 6.1.3A | Maize sourdough   |
| MZ2 6.1.4A | Maize sourdough   |
| MZ2 6.1.5A | Maize sourdough   |
| MZ3 6.1.1A | Maize sourdough   |
| MZ3 6.1.2A | Maize sourdough   |
| MZ3 6.1.3A | Maize sourdough   |
| MZ3 6.1.4A | Maize sourdough   |
| OAT100     | Oat sourdough     |
| OAT107     | Oat sourdough     |
| OAT110     | Oat sourdough     |
| OAT117     | Oat sourdough     |
| OAT119     | Oat sourdough     |
| QN1 7.1.1A | Quinoa sourdough  |
| QN1 8.1.1A | Quinoa sourdough  |
| QN1 8.2.1A | Quinoa sourdough  |
| QN1 8.2.2A | Quinoa sourdough  |
| QN1 9.2.1A | Quinoa sourdough  |
| QN2 7.1.2A | Quinoa sourdough  |
| QN2 7.1.3A | Quinoa sourdough  |
| QN2 7.1.4A | Quinoa sourdough  |
| QN2 7.2.1A | Quinoa sourdough  |
| QN2 8.2.1A | Quinoa sourdough  |
| QN2 8.2.2A | Quinoa sourdough  |
| QN3 7.1.1A | Quinoa sourdough  |
| QN3 8.1.1A | Quinoa sourdough  |
| QN3 8.1.2A | Quinoa sourdough  |
| QN3 9.2.1A | Quinoa sourdough  |
| QN3 9.2.2A | Quinoa sourdough  |
| QN3 9.2.3A | Quinoa sourdough  |
| QN3 9.2.4A | Quinoa sourdough  |
| RYE105     | Rye sourdough     |
| RYE107     | Rye sourdough     |
| RYE108     | Rye sourdough     |
| RYE109     | Rye sourdough     |
| RYE110     | Rye sourdough     |
| RYE111     | Rye sourdough     |
| SG104      | Sorghum sourdough |
| SG107      | Sorghum sourdough |
| SG112      | Sorghum sourdough |
| SG115      | Sorghum sourdough |
| SG116      | Sorghum sourdough |

| Strain     | Origin               |
|------------|----------------------|
| SG117      | Sorghum sourdough    |
| SG118      | Sorghum sourdough    |
| SP1 6.1.1A | Spelt sourdough      |
| SP1 6.1.2A | Spelt sourdough      |
| SP1 6.1.4A | Spelt sourdough      |
| SP2 7.1.2A | Spelt sourdough      |
| SP2 7.1.3A | Spelt sourdough      |
| SP2 7.1.4A | Spelt sourdough      |
| SP3 6.1.1A | Spelt sourdough      |
| SP3 6.1.2A | Spelt sourdough      |
| SP3 6.1.3A | Spelt sourdough      |
| SP3 6.1.4A | Spelt sourdough      |
| SP3 6.1.5A | Spelt sourdough      |
| SP3 7.1.1A | Spelt sourdough      |
| TF1 9.1.2A | Teff sourdough       |
| TF1 9.1.3A | Teff sourdough       |
| TF1 9.2.1A | Teff sourdough       |
| TF2 8.1.1A | Teff sourdough       |
| TF2 8.1.2A | Teff sourdough       |
| TF2 8.2.1A | Teff sourdough       |
| TF2 8.2.3A | Teff sourdough       |
| TF3 7.2.1A | Teff sourdough       |
| TF3 8.1.2A | Teff sourdough       |
| TF3 8.1.4A | Teff sourdough       |
| TF3 9.2.2A | Teff sourdough       |
| TG105      | Tigernut sourdough   |
| TG108      | Tigernut sourdough   |
| TP1 8.1.1A | Tapioca sourdough    |
| TP1 9.2.1A | Tapioca sourdough    |
| TP2 7.1.1A | Tapioca sourdough    |
| TP3 7.1.1A | Tapioca sourdough    |
| TP3 7.2.2A | Tapioca sourdough    |
| TP3 7.2.3A | Tapioca sourdough    |
| TP3 7.2.4A | Tapioca sourdough    |
| WR100      | White rice sourdough |
| WR101      | White rice sourdough |
| WR103      | White rice sourdough |
| WR107      | White rice sourdough |
| WR108      | White rice sourdough |
| WR109      | White rice sourdough |
| WR111      | White rice sourdough |
| WR113      | White rice sourdough |
| WT101      | Watermelon           |
| WT201      | Watermelon           |
| WT202      | Watermelon           |
| WT211      | Watermelon           |
| WT212      | Watermelon           |

| Strain      | Origin               |
|-------------|----------------------|
| WT221       | Watermelon           |
| WT222       | Watermelon           |
| WT301       | Watermelon           |
| WT302       | Watermelon           |
| WT312       | Watermelon           |
| WT313       | Watermelon           |
| WT322       | Watermelon           |
| WT323       | Watermelon           |
| WW106       | Whole wheat flour    |
| WW107       | Whole wheat flour    |
| WW108       | Whole wheat flour    |
| WW110       | Whole wheat flour    |
| WW111       | Whole wheat flour    |
| WW113       | Whole wheat flour    |
| WW114       | Whole wheat flour    |
| YP1 7.1.10A | Yellow pea sourdough |
| YP1 7.1.11A | Yellow pea sourdough |
| YP1 7.1.1A  | Yellow pea sourdough |
| YP1 7.1.2B  | Yellow pea sourdough |
| YP1 7.1.5A  | Yellow pea sourdough |
| YP1 7.1.8A  | Yellow pea sourdough |
| YP2 7.1.3A  | Yellow pea sourdough |
| YP2 7.1.6A  | Yellow pea sourdough |
| YP2 7.1.9B  | Yellow pea sourdough |
| YP3 7.1.12A | Yellow pea sourdough |
| YP3 7.1.14A | Yellow pea sourdough |
| YP3 7.1.1A  | Yellow pea sourdough |
| YP3 7.1.3A  | Yellow pea sourdough |
| YP3 7.1.4A  | Yellow pea sourdough |
| YP3 7.1.5A  | Yellow pea sourdough |
| YP3 7.1.7A  | Yellow pea sourdough |

<sup>T</sup> Type strain.

**Table S2.** Carbohydrates used in the study.

| Carbohydrate                    | Company       | Technical properties                                                                                                                                              |
|---------------------------------|---------------|-------------------------------------------------------------------------------------------------------------------------------------------------------------------|
| Sucrose                         | Sigma Aldrich | ≥99.0% purity                                                                                                                                                     |
| D-(-)-Fructose                  | Sigma Aldrich | ≥98.0% purity                                                                                                                                                     |
| D-Lactose monohydrate           | Sigma Aldrich | ≥98.0% purity                                                                                                                                                     |
| D-Mannitol                      | Sigma Aldrich | ≥99.0% purity                                                                                                                                                     |
| D-(+)-Raffinose<br>pentahydrate | Sigma Aldrich | ≥99.0% purity                                                                                                                                                     |
| Inulin from chicory             | Megazyme      | 95% pure, Total fructose, sucrose, glucose content < 0.1%, DP<br>2-60, main chain glycosidic β-2,1 bond                                                           |
| FOS                             | Megazyme      | 95% pure DP 2-8, Total fructose, sucrose, glucose content ~<br>5%, main chain glycosidic β-2,1 bond, produced by endo-<br>Fructanase hydrolysis of chicory inulin |
